# Supplementary material
Source: publisher site journal article supplement (https://kjim.org/upload/media/kjim-2025-147-Supplementary-Table-1.pdf)
Supplement: Supplementary file 1 [file kjim-2025-147-Supplementary-Table-1.pdf]

**Supplementary Table 1. Prediction models of mortality and kidney failure in patients with chronic kidney disease G3b–5**

| Score       | Outcome                                             | Variables                                                                                                                                                   | Population                                                                                                                                                                                                                        | Discrimination and calibration |
|-------------|-----------------------------------------------------|-------------------------------------------------------------------------------------------------------------------------------------------------------------|-----------------------------------------------------------------------------------------------------------------------------------------------------------------------------------------------------------------------------------|--------------------------------|
| BANSAL [11] | 5-yr risk of death without KRT                      | Age, sex, race, eGFR, ACR, smoking, and comorbidities (diabetes, heart failure, stroke)                                                                     | Developed in 828 patients who were aged $\geq 65$ years and had eGFR $< 60$ mL/min/1.73 m <sup>2</sup> from the Cardiovascular Health Study.<br>Validated in 789 patients from the Health ABC study                               | 0.72/+                         |
| KFRE [12]   | 2- and 5-yr risk of kidney failure                  | Age, sex, eGFR, ACR (4 variables equation) + calcium, phosphate, bicarbonate, and albumin (8 variables equation)                                            | Initially developed and validated in 8,391 patients with eGFR $< 60$ mL/min/1.73 m <sup>2</sup> from the 2 Canadian provinces, subsequently validated in 721,357 patients from more than 30 countries                             | 0.88–0.91/+                    |
| REIN [13]   | Overall mortality during the first 3 mo of dialysis | Age, sex, albuminemia, severe behavioral disorder, mobility, and comorbidities (congestive heart failure, peripheral vascular disease, dysrhythmia, cancer) | 12,500 patients in training set<br>11,848 patients in validation set<br>(Both training and validation set were derived from the REIN registry, which include the patients who started dialysis at age $> 75$ years in the France) | 0.76/-                         |

ABC, Aging and Body Composition; ACR, albumin-to-creatinine ratio; eGFR, estimated glomerular filtration rate; KFRE, Kidney Failure Risk Equation; KRT, kidney replacement therapy; REIN, Renal Epidemiology and Information Network.
